# Supplementary material for: Integrated miRNAome and Transcriptome Analysis Reveals Argonaute 2-Mediated Defense Responses Against the Devastating Phytopathogen Sclerotinia sclerotiorum
Source: Front Plant Sci. 2020 Apr 29;11:500. doi: 10.3389/fpls.2020.00500 (PMC7201365; doi:10.3389/fpls.2020.00500)
Supplement: Supplementary file 2 [file Table_1.XLSX]

## Sheet: Table S1
Supplementary Table S1. Primers used in this study.
Primer name	Sequences
ath-miR170-5p-QRT	TATTGGCCTGGTTCACTCAGA
ath-miR391-3p-QRT	ACGGTATCTCTCCTACGTAGC
ath-miR472-5p-QRT	ATGGTCGAAGTAGGCAAAATC
ath-miR822-3p-QRT	TGTGCAAATGCTTTCTACAGG
ath-miR861-3p-QRT	GATGGATATGTCTTCAAGGAC
2_13869-5p-QRT	ATCAGCTCGGATGACTCTGTCAGC
PEPR2-QRT-F	AAGCACTTCGGGTTCAG
PEPR2-QRT-R	CTTCACGGTATTCAATGGTAGTTA
RbohF-QRT-F	GAAGCCAAAAGCCCTCTA
RbohF-QRT-R	ACGTATGCCTCGGTGTAT
ACS2-QRT-F	CCGACGACTTTACGAGGATGG
ACS2-QRT-R	GGAGTGAAACGCGGACGAGT
MYC2-QRT-F	TTAGAAAGTTATGGGGTCAAAT
MYC2-QRT-R	AGGAGATACAACAATAAAACGATA
RMG1-QRT-F	AATGCGGTTTACAGTTCCT
RMG1-QRT-R	CTTGGTCCGCATAGATAAT
At 18S-rDNA-F	AAACGGCTACCACATCCAAG
At 18S-rDNA-R	CCTCCAATGGATCCTCGTTA
AtU6-F	GATAAAATTGGAACGATACAG
AtU6-R	ATTTGGACCATTTCTCGATTT
