# Supplementary material for: Integrated miRNAome and Transcriptome Analysis Reveals Argonaute 2-Mediated Defense Responses Against the Devastating Phytopathogen Sclerotinia sclerotiorum
Source: Front Plant Sci. 2020 Apr 29;11:500. doi: 10.3389/fpls.2020.00500 (PMC7201365; doi:10.3389/fpls.2020.00500)
Supplement: Supplementary file 5 [file Table_4.XLSX]

## Sheet: Table S4A
Supplementary Table S4A. KEGG enrichment analysis results for DEGs in comparison group WT-Ss/WT
Category	Term	Count	%	P Value	Genes	List Total	Pop Hits	Pop Total	Fold Enrichment	Bonferroni	Benjamini	FDR
KEGG_PATHWAY	ath01110:Biosynthesis of secondary metabolites	168	6.89938	5.55157e-10	AT5G24150, AT1G74020, AT3G44720, AT1G75020, AT5G57190, AT4G37520, AT1G67980, AT4G19010, AT4G39980, AT5G20950, AT4G26530, AT1G20510, AT4G35090, AT5G54960, AT4G11850, AT3G25760, AT1G72680, AT4G26270, AT5G24540, AT4G16700, AT1G74010, AT2G04400, AT5G39580, AT2G37690, AT4G37530, AT4G37670, AT5G38710, AT5G05590, AT3G54640, AT1G16300, AT3G25770, AT1G13700, AT3G53260, AT4G11840, AT5G13930, AT1G58290, AT5…	514	1019	4727	1.5162	6.16224e-08	6.16224e-08	6.28277e-07
KEGG_PATHWAY	ath01100:Metabolic pathways	261	10.7187	4.52059e-09	AT5G24150, AT5G27380, AT3G44720, AT1G75020, AT1G67980, AT5G11920, AT5G20950, AT1G20510, AT5G63980, AT1G01600, AT4G11850, AT1G72680, AT5G58700, AT1G73010, AT3G13790, AT1G71697, AT4G38530, AT4G16265, AT4G39640, AT3G14940, AT2G37690, AT5G38710, AT2G34430, AT3G54640, AT3G53260, AT5G65140, AT4G11840, AT5G13930, AT5G20830, AT1G30520, AT2G16500, AT4G26970, AT1G01480, AT3G45140, AT3G49120, AT5G58390, AT2…	514	1833	4727	1.30948	5.01785e-07	2.50892e-07	5.11599e-06
KEGG_PATHWAY	ath00480:Glutathione metabolism	27	1.10883	3.23281e-06	AT5G27380, AT2G29490, AT1G27140, AT2G29470, AT1G17190, AT1G65820, AT3G02360, AT5G02780, AT1G17170, AT2G24200, AT1G27130, AT4G09010, AT1G02920, AT4G02520, AT2G29420, AT2G02930, AT2G30860, AT2G29440, AT2G29460, AT4G39640, AT1G02930, AT2G29480, AT1G17180, AT4G29210, AT5G40760, AT1G74590, AT2G30870	514	93	4727	2.66995	0.000358778	0.000119607	0.00365854
KEGG_PATHWAY	ath00400:Phenylalanine, tyrosine and tryptophan biosynthesis	20	0.821355	4.16288e-06	AT3G44720, AT2G04400, AT1G25220, AT5G28237, AT4G39980, AT5G54810, AT2G45300, AT5G22630, AT5G05590, AT1G24807, AT1G48850, AT1G22410, AT5G38530, AT3G54640, AT5G05730, AT2G24850, AT5G17990, AT4G27070, AT2G22250, AT5G34930	514	57	4727	3.22684	0.000461974	0.000115513	0.00471107
KEGG_PATHWAY	ath00940:Phenylpropanoid biosynthesis	36	1.47844	1.92397e-05	AT5G05340, AT5G06730, AT4G37520, AT4G19010, AT1G67980, AT4G08770, AT5G20950, AT5G64120, AT3G49110, AT3G49120, AT5G58390, AT2G37040, AT1G61810, AT1G45191, AT1G14540, AT1G02850, AT4G34230, AT5G24550, AT1G72680, AT4G11290, AT5G24540, AT2G37130, AT5G39580, AT1G67990, AT4G36220, AT4G37530, AT3G21230, AT1G80820, AT3G60120, AT4G37970, AT3G60140, AT2G44480, AT1G14550, AT2G30490, AT3G53260, AT1G61820	514	157	4727	2.10875	0.00213335	0.000427035	0.0217716
KEGG_PATHWAY	ath04626:Plant-pathogen interaction	36	1.47844	2.56727e-05	AT5G47910, AT2G41100, AT2G19190, AT4G20780, AT2G41410, AT3G21220, AT5G51060, AT2G13790, AT1G51660, AT1G01340, AT2G14610, AT5G52640, AT5G42380, AT1G21550, AT1G76650, AT4G29810, AT4G01010, AT2G38470, AT3G21630, AT1G76040, AT5G56010, AT2G46430, AT3G57530, AT2G41110, AT2G46450, AT3G47480, AT4G35310, AT1G18210, AT5G56030, AT3G50770, AT3G17690, AT3G20410, AT3G01830, AT5G20480, AT4G33430, AT3G48080	514	159	4727	2.08223	0.00284565	0.000474839	0.0290502
KEGG_PATHWAY	ath00196:Photosynthesis - antenna proteins	10	0.410678	0.000264182	AT2G34430, AT2G05100, AT2G05070, AT3G54890, AT1G19150, AT3G27690, AT1G15820, AT3G08940, AT5G54270, AT2G40100	514	22	4727	4.18023	0.0289021	0.00418095	0.29857
KEGG_PATHWAY	ath01200:Carbon metabolism	47	1.93018	0.000522142	AT2G36580, AT3G55800, AT4G26910, AT2G45290, AT1G17745, AT1G55920, AT5G38410, AT4G15530, AT4G26530, AT4G33010, AT4G26970, AT4G35090, AT1G32060, AT3G02360, AT3G04050, AT1G11860, AT1G17290, AT1G68010, AT1G71100, AT4G37550, AT4G26270, AT3G14940, AT5G08300, AT4G26520, AT5G07440, AT2G21330, AT4G31810, AT2G13360, AT5G58330, AT5G38420, AT3G26650, AT5G63680, AT3G19480, AT3G13110, AT4G35650, AT5G40760, AT5…	514	262	4727	1.64975	0.0563245	0.00722042	0.589324
KEGG_PATHWAY	ath00710:Carbon fixation in photosynthetic organisms	18	0.73922	0.000839395	AT1G71100, AT3G55800, AT3G14940, AT2G45290, AT4G26520, AT2G21330, AT5G58330, AT4G15530, AT5G38410, AT3G26650, AT4G26530, AT5G38420, AT1G32060, AT5G11670, AT1G16300, AT5G38430, AT1G17290, AT1G72330	514	69	4727	2.39909	0.0889996	0.0103034	0.945849
KEGG_PATHWAY	ath00592:alpha-Linolenic acid metabolism	12	0.492813	0.00105267	AT1G20510, AT1G17420, AT3G45140, AT5G42650, AT3G25770, AT1G72520, AT2G06050, AT3G25760, AT1G76680, AT1G19640, AT3G25780, AT4G16760	514	36	4727	3.0655	0.110333	0.0116227	1.18487
KEGG_PATHWAY	ath01230:Biosynthesis of amino acids	44	1.80698	0.00169477	AT3G17390, AT2G36580, AT3G44720, AT2G45290, AT1G17745, AT1G25220, AT1G55920, AT5G28237, AT4G39980, AT4G26530, AT2G45300, AT4G26970, AT5G22630, AT1G24807, AT3G04050, AT1G10070, AT1G17290, AT5G34930, AT5G17990, AT1G71100, AT4G26270, AT1G08630, AT2G39800, AT2G04400, AT4G26520, AT4G37670, AT2G21330, AT5G54810, AT5G63680, AT3G19480, AT4G35650, AT3G13110, AT5G05590, AT1G22410, AT1G48850, AT5G38530, AT3…	514	254	4727	1.59309	0.171616	0.0169706	1.9013
KEGG_PATHWAY	ath04075:Plant hormone signal transduction	45	1.84805	0.00222916	AT5G53590, AT5G59220, AT5G18030, AT4G34760, AT2G47750, AT5G45110, AT5G13320, AT5G47220, AT4G37390, AT3G57040, AT5G13220, AT3G63010, AT2G21210, AT4G34160, AT4G38860, AT2G14610, AT1G74890, AT4G26120, AT5G18060, AT3G11410, AT2G23170, AT1G32640, AT4G36110, AT5G62920, AT5G18020, AT4G14550, AT2G36270, AT5G17490, AT5G50760, AT5G57560, AT4G38840, AT2G28085, AT4G34000, AT1G04100, AT1G19180, AT5G13370, AT2…	514	265	4727	1.56167	0.219416	0.0204311	2.49395
KEGG_PATHWAY	ath00460:Cyanoamino acid metabolism	15	0.616016	0.00405989	AT4G37550, AT4G39640, AT5G24540, AT3G44300, AT5G20950, AT3G60120, AT4G29210, AT2G44480, AT3G60140, AT5G22300, AT1G45191, AT1G61810, AT1G02850, AT5G24550, AT1G61820	514	60	4727	2.29912	0.363369	0.0341394	4.4996
KEGG_PATHWAY	ath00860:Porphyrin and chlorophyll metabolism	13	0.533881	0.00419004	AT1G74470, AT4G16690, AT2G31250, AT3G44880, AT1G09940, AT1G19670, AT5G26030, AT5G54190, AT1G44446, AT5G13630, AT3G56940, AT1G58290, AT5G56090	514	48	4727	2.49072	0.372538	0.0327428	4.64074
KEGG_PATHWAY	ath00966:Glucosinolate biosynthesis	6	0.246407	0.00610547	AT2G22330, AT2G20610, AT4G31500, AT1G74100, AT4G39950, AT1G24100	514	12	4727	4.59825	0.493274	0.0443074	6.69607
KEGG_PATHWAY	ath00260:Glycine, serine and threonine metabolism	16	0.657084	0.00911513	AT1G08630, AT1G17745, AT5G28237, AT2G13360, AT4G33010, AT5G54810, AT3G19480, AT1G32470, AT5G38530, AT3G54640, AT4G35630, AT3G17240, AT1G11860, AT1G68010, AT2G26080, AT4G27070	514	72	4727	2.04367	0.638111	0.0615504	9.84411
KEGG_PATHWAY	ath00901:Indole alkaloid biosynthesis	4	0.164271	0.01977	AT1G74000, AT1G74020, AT1G74010, AT4G37150	514	6	4727	6.131	0.891005	0.122238	20.2266
KEGG_PATHWAY	ath00630:Glyoxylate and dicarboxylate metabolism	15	0.616016	0.0259147	AT4G37550, AT2G13360, AT5G38410, AT5G38420, AT4G33010, AT4G26970, AT4G35090, AT1G32470, AT5G04140, AT5G38430, AT3G17240, AT1G11860, AT1G17650, AT1G68010, AT2G26080	514	74	4727	1.86416	0.945767	0.149486	25.7065
KEGG_PATHWAY	ath00520:Amino sugar and nucleotide sugar metabolism	23	0.944559	0.0323263	AT5G51830, AT3G12500, AT2G47650, AT3G54420, AT2G43620, AT3G51160, AT2G31390, AT3G02230, AT1G30620, AT3G24090, AT5G09730, AT2G43570, AT1G02730, AT1G67070, AT3G19620, AT3G47540, AT5G15650, AT2G43580, AT2G43590, AT4G19810, AT5G15490, AT5G39320, AT4G20460	514	135	4727	1.56681	0.973944	0.174671	31.0566
KEGG_PATHWAY	ath00910:Nitrogen metabolism	10	0.410678	0.0330884	AT4G37550, AT3G01500, AT3G52720, AT1G12940, AT5G04140, AT3G44300, AT2G28210, AT1G77760, AT5G07440, AT5G14740	514	42	4727	2.18964	0.976126	0.170347	31.6685
KEGG_PATHWAY	ath03008:Ribosome biogenesis in eukaryotes	18	0.73922	0.0426284	AT3G57150, AT5G11240, AT5G22100, AT1G06720, AT5G20160, AT4G12600, AT3G57940, AT5G27120, AT5G66540, AT2G18900, AT4G25630, AT5G27140, AT4G04940, AT3G06530, AT3G21540, AT1G67120, AT5G08180, AT1G56110	514	101	4727	1.63898	0.992058	0.205677	38.9217
KEGG_PATHWAY	ath00920:Sulfur metabolism	9	0.36961	0.0543935	AT3G13110, AT5G63980, AT4G04610, AT2G14750, AT4G39940, AT1G55920, AT4G14680, AT4G21990, AT3G22890	514	39	4727	2.12227	0.997987	0.245866	46.8978
KEGG_PATHWAY	ath00380:Tryptophan metabolism	10	0.410678	0.0555731	AT2G22330, AT4G35090, AT2G20610, AT4G31500, AT1G74100, AT3G44300, AT2G30770, AT4G39950, AT1G24100, AT5G20960	514	46	4727	1.99924	0.998247	0.241143	47.6427

## Sheet: Table S4B
Supplementary Table S4B. KEGG enrichment analysis results for DEGs in comparison group ago2/WT
Category	Term	Count	%	P Value	Genes	List Total	Pop Hits	Pop Total	Fold Enrichment	Bonferroni	Benjamini	FDR
KEGG_PATHWAY	ath00910:Nitrogen metabolism	3	2.34375	0.00854768	AT1G08090, AT3G44300, AT5G07440	17	42	4727	19.8613	0.172095	0.172095	6.49774
KEGG_PATHWAY	ath00940:Phenylpropanoid biosynthesis	4	3.125	0.0146426	AT4G11290, AT5G05340, AT3G60140, AT1G02850	17	157	4727	7.0843	0.277125	0.149779	10.9031
KEGG_PATHWAY	ath00460:Cyanoamino acid metabolism	3	2.34375	0.0169602	AT3G60140, AT3G44300, AT1G02850	17	60	4727	13.9029	0.313621	0.117893	12.5301
KEGG_PATHWAY	ath00480:Glutathione metabolism	3	2.34375	0.0384208	AT1G17170, AT2G29490, AT2G29480	17	93	4727	8.96964	0.577652	0.193847	26.4072

## Sheet: Table S4C
Supplementary Table S4C. KEGG enrichment analysis results for DEGs in comparison group ago2-Ss/WT-Ss
Category	Term	Count	%	P Value	Genes	List Total	Pop Hits	Pop Total	Fold Enrichment	Bonferroni	Benjamini	FDR
KEGG_PATHWAY	ath01110:Biosynthesis of secondary metabolites	63	7.89474	2.75009e-11	AT5G06730, AT5G57190, AT3G20440, AT3G43670, AT1G61810, AT3G25760, AT5G19880, AT5G52570, AT5G17330, AT5G24540, AT4G16700, AT5G39580, AT4G18360, AT5G38710, AT4G15440, AT4G34050, AT3G60140, AT1G19670, AT4G08870, AT3G25770, AT3G53260, AT2G24850, AT1G31690, AT5G54160, AT5G55120, AT2G13810, AT2G44810, AT5G66220, AT2G45290, AT4G23600, AT5G28237, AT2G20340, AT3G03670, AT5G64120, AT1G01480, AT3G45140, AT3…	132	1019	4727	2.214	1.70506e-09	1.70506e-09	2.77525e-08
KEGG_PATHWAY	ath00940:Phenylpropanoid biosynthesis	23	2.88221	1.6203e-10	AT5G54160, AT5G19880, AT5G24540, AT5G06730, AT5G39580, AT3G21230, AT3G03670, AT5G64120, AT1G80820, AT3G60120, AT3G10340, AT3G49110, AT4G34050, AT3G49120, AT3G60140, AT2G37040, AT2G30490, AT1G61810, AT3G53260, AT5G06720, AT5G24550, AT1G51680, AT1G61820	132	157	4727	5.24614	1.00459e-08	5.02295e-09	1.63513e-07
KEGG_PATHWAY	ath00592:alpha-Linolenic acid metabolism	12	1.50376	1.62032e-09	AT4G15440, AT1G17420, AT3G45140, AT3G01420, AT2G44810, AT5G42650, AT3G25770, AT2G06050, AT3G25760, AT1G19640, AT3G25780, AT4G16760	132	36	4727	11.9369	1.0046e-07	3.34866e-08	1.63514e-06
KEGG_PATHWAY	ath00360:Phenylalanine metabolism	12	1.50376	1.00192e-08	AT3G43670, AT3G10340, AT4G34050, AT2G37040, AT4G23600, AT2G30490, AT3G53260, AT2G24850, AT1G31690, AT3G21230, AT1G51680, AT4G23590	132	42	4727	10.2316	6.21192e-07	1.55298e-07	1.01109e-05
KEGG_PATHWAY	ath01100:Metabolic pathways	79	9.89975	8.7941e-07	AT5G06730, AT1G53830, AT5G57190, AT3G20440, AT2G47550, AT3G43670, AT2G07671, AT1G64200, AT1G61810, AT3G25760, AT1G73010, AT2G45220, AT3G09940, AT5G19880, AT5G52570, AT5G17330, AT5G24540, AT4G16700, AT5G39580, AT5G07440, AT4G18360, AT5G38710, AT4G25000, AT4G34050, AT3G60140, AT1G19670, AT4G08870, AT2G28760, AT3G25770, AT3G53260, AT5G65140, AT2G24850, AT4G02330, AT1G31690, AT5G54160, AT5G55120, AT4…	132	1833	4727	1.54339	5.4522e-05	1.09046e-05	0.000887454
KEGG_PATHWAY	ath00950:Isoquinoline alkaloid biosynthesis	6	0.75188	0.00034098	AT3G43670, AT4G23600, AT2G24850, AT2G20340, AT1G31690, AT4G23590	132	23	4727	9.3419	0.0209224	0.00351786	0.343567
KEGG_PATHWAY	ath00500:Starch and sucrose metabolism	12	1.50376	0.000612055	AT3G60120, AT4G25000, AT5G24540, AT3G60140, AT1G62660, AT3G20440, AT1G61810, AT5G65140, AT1G73370, AT1G35910, AT5G24550, AT1G61820	132	125	4727	3.43782	0.0372476	0.00540805	0.61594
KEGG_PATHWAY	ath00350:Tyrosine metabolism	7	0.877193	0.000714619	AT3G43670, AT5G24760, AT4G23600, AT2G24850, AT2G20340, AT1G31690, AT4G23590	132	40	4727	6.26686	0.0433544	0.00552496	0.71882
KEGG_PATHWAY	ath00130:Ubiquinone and other terpenoid-quinone biosynthesis	6	0.75188	0.00251986	AT4G23600, AT2G30490, AT2G24850, AT3G21230, AT1G51680, AT4G23590	132	35	4727	6.13896	0.144807	0.0172308	2.51399
KEGG_PATHWAY	ath00480:Glutathione metabolism	9	1.12782	0.00395767	AT3G09270, AT2G29460, AT1G69920, AT1G69930, AT2G29490, AT2G29480, AT2G29450, AT2G29470, AT2G29440	132	93	4727	3.46554	0.21797	0.0242865	3.9228
KEGG_PATHWAY	ath00460:Cyanoamino acid metabolism	7	0.877193	0.00593178	AT3G60120, AT5G24540, AT3G60140, AT3G44300, AT1G61810, AT5G24550, AT1G61820	132	60	4727	4.1779	0.308482	0.0329772	5.8272
KEGG_PATHWAY	ath04075:Plant hormone signal transduction	16	2.00501	0.00609819	AT4G36110, AT5G62920, AT5G59220, AT5G50760, AT4G12410, AT5G13320, AT4G37390, AT1G17380, AT5G13220, AT4G32280, AT1G19050, AT1G07430, AT1G74950, AT1G74890, AT1G70700, AT1G32640	132	265	4727	2.16215	0.315622	0.0311096	5.98618
KEGG_PATHWAY	ath00960:Tropane, piperidine and pyridine alkaloid biosynthesis	5	0.626566	0.0167073	AT3G43670, AT4G23600, AT2G24850, AT1G31690, AT4G23590	132	36	4727	4.9737	0.648169	0.0772106	15.6357
KEGG_PATHWAY	ath00400:Phenylalanine, tyrosine and tryptophan biosynthesis	6	0.75188	0.0200371	AT5G22630, AT1G22410, AT4G23600, AT5G28237, AT2G24850, AT4G23590	132	57	4727	3.76954	0.714899	0.0857366	18.4747
KEGG_PATHWAY	ath00906:Carotenoid biosynthesis	4	0.501253	0.0449772	AT5G52570, AT1G52400, AT3G14440, AT4G19230	132	29	4727	4.93939	0.942343	0.17322	37.1495

## Sheet: Table S4D
Supplementary Table S4D. KEGG enrichment analysis results for DEGs in comparison group ago2-Ss/ago2
Category	Term	Count	%	P Value	Genes	List Total	Pop Hits	Pop Total	Fold Enrichment	Bonferroni	Benjamini	FDR
KEGG_PATHWAY	ath01110:Biosynthesis of secondary metabolites	185	6.27119	2.56086e-12	AT5G63770, AT1G66280, AT1G74020, AT3G44720, AT1G75020, AT5G57190, AT1G67980, AT5G11520, AT4G39980, AT5G14060, AT3G61220, AT4G17260, AT1G20510, AT4G35090, AT4G26200, AT3G25760, AT1G72680, AT4G26270, AT5G19880, AT1G74010, AT2G04400, AT5G39580, AT4G37670, AT5G38710, AT3G49160, AT3G18850, AT4G15440, AT5G05590, AT3G54640, AT1G16300, AT3G25770, AT1G13700, AT3G53260, AT5G13930, AT1G58290, AT1G52340, AT4…	549	1019	4727	1.56319	2.86814e-10	2.86814e-10	2.90291e-09
KEGG_PATHWAY	ath00400:Phenylalanine, tyrosine and tryptophan biosynthesis	24	0.813559	2.24934e-08	AT5G19550, AT1G24909, AT3G44720, AT2G04400, AT5G28237, AT5G11520, AT4G39980, AT1G29410, AT5G54810, AT2G45300, AT5G22630, AT5G05590, AT1G48850, AT1G22410, AT5G38530, AT1G08250, AT3G54640, AT5G05730, AT2G24850, AT5G17990, AT4G27070, AT2G22250, AT5G34930, AT1G69370	549	57	4727	3.62535	2.51925e-06	1.25963e-06	2.5498e-05
KEGG_PATHWAY	ath01100:Metabolic pathways	270	9.15254	1.17515e-07	AT5G27380, AT3G44720, AT1G67880, AT1G75020, AT4G02280, AT1G67980, AT5G11520, AT5G14060, AT1G20510, AT5G63980, AT4G08170, AT4G26200, AT1G01600, AT2G22240, AT1G72680, AT1G73010, AT3G13790, AT1G71697, AT4G39640, AT5G38710, AT3G49160, AT4G36480, AT3G25570, AT3G54640, AT3G53260, AT5G65140, AT5G13930, AT2G13810, AT2G18620, AT5G20830, AT1G30520, AT2G20420, AT2G16500, AT2G44490, AT4G26970, AT1G01480, AT3…	549	1833	4727	1.26828	1.31616e-05	4.38723e-06	0.000133213
KEGG_PATHWAY	ath01230:Biosynthesis of amino acids	56	1.89831	1.79562e-06	AT3G17390, AT2G36580, AT3G44720, AT5G11520, AT5G14060, AT4G39980, AT5G56760, AT4G35830, AT1G10070, AT1G17290, AT5G34930, AT4G26270, AT2G04400, AT4G37670, AT3G49160, AT1G29410, AT5G54810, AT2G31100, AT5G05590, AT1G08250, AT3G54640, AT1G16300, AT2G24850, AT1G72330, AT4G27070, AT2G13810, AT1G24909, AT2G45290, AT1G17745, AT1G55920, AT5G28237, AT2G45300, AT4G26970, AT5G22630, AT1G14810, AT5G56350, AT3…	549	254	4727	1.89831	0.00020109	5.02762e-05	0.00203546
KEGG_PATHWAY	ath04626:Plant-pathogen interaction	40	1.35593	2.70857e-06	AT5G37770, AT5G47910, AT2G41100, AT2G17290, AT5G04170, AT2G19190, AT2G41410, AT3G21220, AT5G51060, AT3G25600, AT2G13790, AT1G01340, AT5G52640, AT1G21550, AT1G76650, AT4G01010, AT1G35670, AT1G64060, AT2G38470, AT3G21630, AT3G10300, AT1G76040, AT4G09570, AT2G46430, AT3G57530, AT2G41110, AT4G35310, AT3G47480, AT4G01250, AT3G50770, AT2G43290, AT3G17690, AT3G20410, AT3G01830, AT5G04870, AT3G59350, AT5…	549	159	4727	2.16609	0.000303314	6.06702e-05	0.00307033
KEGG_PATHWAY	ath04075:Plant hormone signal transduction	55	1.86441	1.51497e-05	AT1G75590, AT5G59220, AT1G28130, AT3G03850, AT2G47750, AT4G22620, AT5G13320, AT4G37390, AT5G20810, AT5G13220, AT3G63010, AT2G21210, AT5G18060, AT2G23170, AT1G73730, AT1G32640, AT2G41310, AT4G36110, AT4G14550, AT3G03840, AT5G57560, AT4G38840, AT4G12410, AT5G13370, AT3G04580, AT5G57050, AT1G74950, AT5G53590, AT3G03830, AT5G18030, AT4G34760, AT5G45110, AT5G47220, AT3G57040, AT4G32280, AT4G38860, AT4…	549	265	4727	1.78702	0.00169534	0.000282756	0.017172
KEGG_PATHWAY	ath00592:alpha-Linolenic acid metabolism	15	0.508475	2.24072e-05	AT1G20510, AT4G15440, AT1G17420, AT3G45140, AT3G01420, AT2G44810, AT5G42650, AT3G25770, AT2G06050, AT1G72520, AT3G25760, AT1G19640, AT1G76680, AT3G25780, AT4G16760	549	36	4727	3.58758	0.00250648	0.000358454	0.0253973
KEGG_PATHWAY	ath00520:Amino sugar and nucleotide sugar metabolism	32	1.08475	0.000112673	AT5G51830, AT3G12500, AT2G47650, AT2G43620, AT4G12250, AT4G19820, AT3G51160, AT2G31390, AT5G17770, AT3G02230, AT1G30620, AT5G24090, AT2G43570, AT5G15650, AT5G44480, AT2G43590, AT3G01640, AT3G29360, AT5G39320, AT3G54420, AT1G78570, AT2G43610, AT3G24090, AT5G15470, AT1G67070, AT4G23920, AT3G01040, AT3G47540, AT2G43580, AT2G39770, AT4G19810, AT5G15490	549	135	4727	2.04094	0.0125408	0.00157627	0.12765
KEGG_PATHWAY	ath00940:Phenylpropanoid biosynthesis	34	1.15254	0.000402947	AT5G64100, AT1G66280, AT5G05340, AT3G21770, AT1G67980, AT2G44490, AT3G03670, AT5G64120, AT3G10340, AT3G60130, AT2G37040, AT1G45191, AT1G14540, AT1G02850, AT4G34230, AT5G06720, AT4G33420, AT1G51680, AT1G72680, AT4G11290, AT5G19880, AT1G52760, AT5G39580, AT4G36220, AT3G21230, AT1G80820, AT3G60120, AT3G21560, AT4G34050, AT2G44480, AT1G14550, AT2G30490, AT3G53260, AT1G61820	549	157	4727	1.86463	0.0441355	0.00500291	0.455822
KEGG_PATHWAY	ath00480:Glutathione metabolism	22	0.745763	0.00177106	AT4G08390, AT4G39640, AT5G27380, AT3G24170, AT1G02930, AT1G65820, AT3G09270, AT4G29210, AT1G17170, AT2G24200, AT5G40760, AT1G07890, AT1G02920, AT5G62480, AT4G02520, AT2G29420, AT2G30870, AT1G78370, AT2G02930, AT2G29450, AT2G29440, AT2G30860	549	93	4727	2.03682	0.180068	0.0196577	1.98936
KEGG_PATHWAY	ath01210:2-Oxocarboxylic acid metabolism	18	0.610169	0.00390153	AT2G22330, AT5G19550, AT1G74100, AT4G37670, AT4G39950, AT5G11520, AT5G14060, AT4G26970, AT2G20610, AT2G31100, AT1G14810, AT4G31500, AT2G17130, AT4G35830, AT1G10070, AT1G17290, AT1G24100, AT1G72330	549	74	4727	2.09437	0.354562	0.0390207	4.33459
KEGG_PATHWAY	ath00330:Arginine and proline metabolism	14	0.474576	0.00618562	AT2G43020, AT5G13700, AT5G61160, AT5G19550, AT2G39800, AT2G16500, AT3G06300, AT5G38710, AT5G11520, AT4G34710, AT3G25570, AT2G17720, AT4G25600, AT1G65840	549	53	4727	2.27439	0.500896	0.0562668	6.792
KEGG_PATHWAY	ath00360:Phenylalanine metabolism	12	0.40678	0.00680299	AT3G10340, AT5G19550, AT4G34050, AT2G37040, AT2G30490, AT3G53260, AT1G67980, AT2G24850, AT5G11520, AT3G21230, AT1G51680, AT2G22250	549	42	4727	2.46006	0.534451	0.0571147	7.44626
KEGG_PATHWAY	ath00966:Glucosinolate biosynthesis	6	0.20339	0.00811502	AT2G22330, AT2G20610, AT4G31500, AT1G74100, AT4G39950, AT1G24100	549	12	4727	4.3051	0.598517	0.0631059	8.8228
KEGG_PATHWAY	ath00053:Ascorbate and aldarate metabolism	11	0.372881	0.0161562	AT5G55120, AT3G09940, AT4G08390, AT1G07890, AT3G01640, AT5G03630, AT5G15490, AT3G29360, AT5G39320, AT5G21100, AT1G14520	549	41	4727	2.31005	0.838665	0.114514	16.8595
KEGG_PATHWAY	ath00270:Cysteine and methionine metabolism	20	0.677966	0.0174742	AT3G17390, AT5G19550, AT4G11280, AT3G23810, AT1G55920, AT5G11520, AT5G14060, AT4G17260, AT1G01480, AT4G01850, AT3G25570, AT1G14810, AT4G37770, AT1G05010, AT4G26200, AT5G56760, AT3G25900, AT5G28030, AT2G24850, AT1G12010	549	99	4727	1.73943	0.861156	0.11609	18.1134
KEGG_PATHWAY	ath00460:Cyanoamino acid metabolism	14	0.474576	0.0178242	AT4G37550, AT4G39640, AT1G66280, AT3G44300, AT2G44490, AT3G44320, AT3G60120, AT4G29210, AT3G60130, AT2G44480, AT5G22300, AT1G45191, AT1G02850, AT1G61820	549	60	4727	2.00905	0.866588	0.111738	18.4434
KEGG_PATHWAY	ath00920:Sulfur metabolism	10	0.338983	0.030947	AT5G63980, AT4G04610, AT2G14750, AT5G54390, AT5G56760, AT4G39940, AT1G55920, AT4G14680, AT4G21990, AT5G28030	549	39	4727	2.20774	0.970425	0.17766	29.9773
KEGG_PATHWAY	ath00906:Carotenoid biosynthesis	8	0.271186	0.0435222	AT1G52400, AT4G19170, AT5G45340, AT3G14440, AT2G29090, AT1G03055, AT4G19230, AT1G52340	549	29	4727	2.37523	0.993152	0.230722	39.6142
KEGG_PATHWAY	ath00860:Porphyrin and chlorophyll metabolism	11	0.372881	0.0451569	AT1G09940, AT1G19670, AT1G03630, AT5G26030, AT5G54190, AT1G74470, AT1G44446, AT1G58300, AT5G13630, AT1G58290, AT3G56940	549	48	4727	1.97317	0.994346	0.227996	40.7738
KEGG_PATHWAY	ath00910:Nitrogen metabolism	10	0.338983	0.0477005	AT1G08090, AT4G37550, AT3G52720, AT3G45060, AT1G12940, AT3G44300, AT5G07440, AT5G14740, AT5G60780, AT3G44320	549	42	4727	2.05005	0.995806	0.229465	42.5379
KEGG_PATHWAY	ath00040:Pentose and glucuronate interconversions	15	0.508475	0.051605	AT2G45220, AT5G04310, AT1G53830, AT5G19730, AT3G43270, AT2G47550, AT1G11580, AT3G54920, AT4G24780, AT3G01640, AT5G15490, AT3G53190, AT5G39320, AT3G29360, AT4G02330	549	76	4727	1.69938	0.997353	0.23642	45.1527
KEGG_PATHWAY	ath01130:Biosynthesis of antibiotics	62	2.10169	0.0688074	AT2G36580, AT4G26910, AT3G44720, AT5G11520, AT5G14060, AT4G39980, AT4G17260, AT4G35090, AT5G66760, AT4G35830, AT1G10070, AT2G22240, AT4G26270, AT5G08300, AT4G37670, AT5G38710, AT3G49160, AT2G31100, AT1G08250, AT1G16300, AT1G13700, AT3G17240, AT2G24850, AT2G13810, AT2G18620, AT2G45290, AT1G17745, AT2G20420, AT3G55410, AT5G50370, AT2G45300, AT4G26970, AT3G01820, AT5G22630, AT4G23730, AT1G14810, AT5…	549	439	4727	1.21602	0.999659	0.293299	55.4304
KEGG_PATHWAY	ath00591:Linoleic acid metabolism	4	0.135593	0.0763543	AT1G17420, AT3G45140, AT1G72520, AT1G55020	549	9	4727	3.82676	0.999863	0.30972	59.3579
KEGG_PATHWAY	ath00380:Tryptophan metabolism	10	0.338983	0.0780625	AT2G22330, AT4G35090, AT2G20610, AT4G31500, AT1G74100, AT3G44300, AT4G39950, AT1G24100, AT3G55410, AT3G44320	549	46	4727	1.87178	0.999889	0.305196	60.2018
KEGG_PATHWAY	ath01200:Carbon metabolism	39	1.32203	0.0814396	AT2G36580, AT4G26910, AT2G24270, AT2G45290, AT1G17745, AT2G20420, AT1G55920, AT3G55410, AT5G11520, AT4G15530, AT4G26970, AT4G35090, AT5G66760, AT5G56350, AT3G04050, AT5G56760, AT4G35830, AT1G17290, AT5G28030, AT4G37550, AT4G26270, AT5G19550, AT5G08300, AT1G74030, AT5G07440, AT2G21330, AT3G49160, AT5G63680, AT3G19480, AT5G40760, AT1G78050, AT5G11670, AT1G16300, AT1G13700, AT5G36880, AT2G17130, AT5…	549	262	4727	1.28167	0.999926	0.306448	61.8234
KEGG_PATHWAY	ath00250:Alanine, aspartate and glutamate metabolism	10	0.338983	0.0968413	AT5G17330, AT5G19550, AT5G14760, AT5G07440, AT1G17290, AT5G11520, AT3G47340, AT1G72330, AT2G02010, AT3G24090	549	48	4727	1.79379	0.999989	0.344606	68.4826
