# Supplementary material for: Integrated miRNAome and Transcriptome Analysis Reveals Argonaute 2-Mediated Defense Responses Against the Devastating Phytopathogen Sclerotinia sclerotiorum
Source: Front Plant Sci. 2020 Apr 29;11:500. doi: 10.3389/fpls.2020.00500 (PMC7201365; doi:10.3389/fpls.2020.00500)
Supplement: Supplementary file 16 [file Table_15.XLSX]

## Sheet: Table S15
Supplementary Table S15. Potential AGO2-regulated DEM-DEG pairs related to defense response
DEM	Fold change (miRNA)	Regulation of miRNA (ago2/WT)	DEG ID	Annotation of target gene	Fold change (mRNA)	Q value	Regulation of target gene(ago2/WT)
ath-miR391-3p	-2.68	Down	AT2G29480	Glutathione S-transferase U2	3.41	0.00319904	Up
			AT2G39310	Jacalin-related lectin 22	2.51	0.00319904	Up
ath-miR391-5p	1.55	Up	AT4G23810	Probable WRKY transcription factor 53	-2.16	0.00319904	Down
ath-miR393a-3p	-1.57	Down	AT2G29480	Glutathione S-transferase U2	3.41	0.00319904	Up
			AT1G52030	Myrosinase-binding protein 2	2.68	0.00319904	Up
			AT1G21250	Wall-associated receptor kinase 1	2.07	0.00319904	Up
ath-miR398a-3p	-2.72	Down	AT1G52030	Myrosinase-binding protein 2	2.68	0.00319904	Up
			AT3G23120	receptor like protein 38	2.17	0.0058593	Up
1_41269-5p	-1.79	Down	AT1G52030	Myrosinase-binding protein 2	2.68	0.00319904	Up
